# Supplementary material for: Potentially Functional SNPs (pfSNPs) as Novel Genomic Predictors of 5-FU Response in Metastatic Colorectal Cancer Patients
Source: PLOS journal article supplement (doi:10.1371/journal.pone.0111694), 2014-11-05
Supplement: S8 (10.1371/journal.pone.0111694.s008) [file journal.pone.0111694.s008]

**Table S3. The MAF for SNPs selected for genotyping in each region based on HapMap R27 CHB.**

|         | Coding, 3' UTR<br>and Promoter | Intron |
|---------|--------------------------------|--------|
| MAF >5  | 331                            | 323    |
| MAF <5  | 129                            | 74     |
| MAF =0  | 201                            | 2      |
| Unknown | 467                            | 23     |
